# Supplementary material
Source: MDPI journal article supplement (https://www.mdpi.com/2297-8739/10/3/150)
Supplement: s1 [file s1 › separations-2237051-supplementary.pdf]

Analysis of Sugars in Honey Samples by Capillary Zone Electrophoresis  
Using Fluorescent Detection

Melinda Andrasi\*, Gyongyi Gyemant, Zsofi Sajtos, Cynthia Nagy

Department of Inorganic and Analytical Chemistry  
University of Debrecen  
H-4032, Debrecen, Egyetem ter 1., Hungary

\*Correspondence: [andrasi.melinda@science.unideb.hu](mailto:andrasi.melinda@science.unideb.hu)

Table S1: The comparison of resolution using different BGE.

(A) 25 mM ammonium acetate (pH 4.5), (B) 25 mM ammonium acetate-0.3 % PEO 90000 (pH 4.5), (C) 40 mM EACA (pH 4.5), (D) 40 mM EACA-0.02 % HPMC (pH 4.5)

The analysis conditions were the same as stated at Figure 2.

|                    | Resolution |       |       |       |
|--------------------|------------|-------|-------|-------|
|                    | A          | B     | C     | D     |
| Fructose - Glucose | 0          | 1.562 | 1.371 | 1.716 |
| Glucose - Mannose  | 0.293      | 1.015 | 0.537 | 0.674 |
| Mannose- Maltose   | 2.290      | 4.387 | 2.760 | 3.885 |

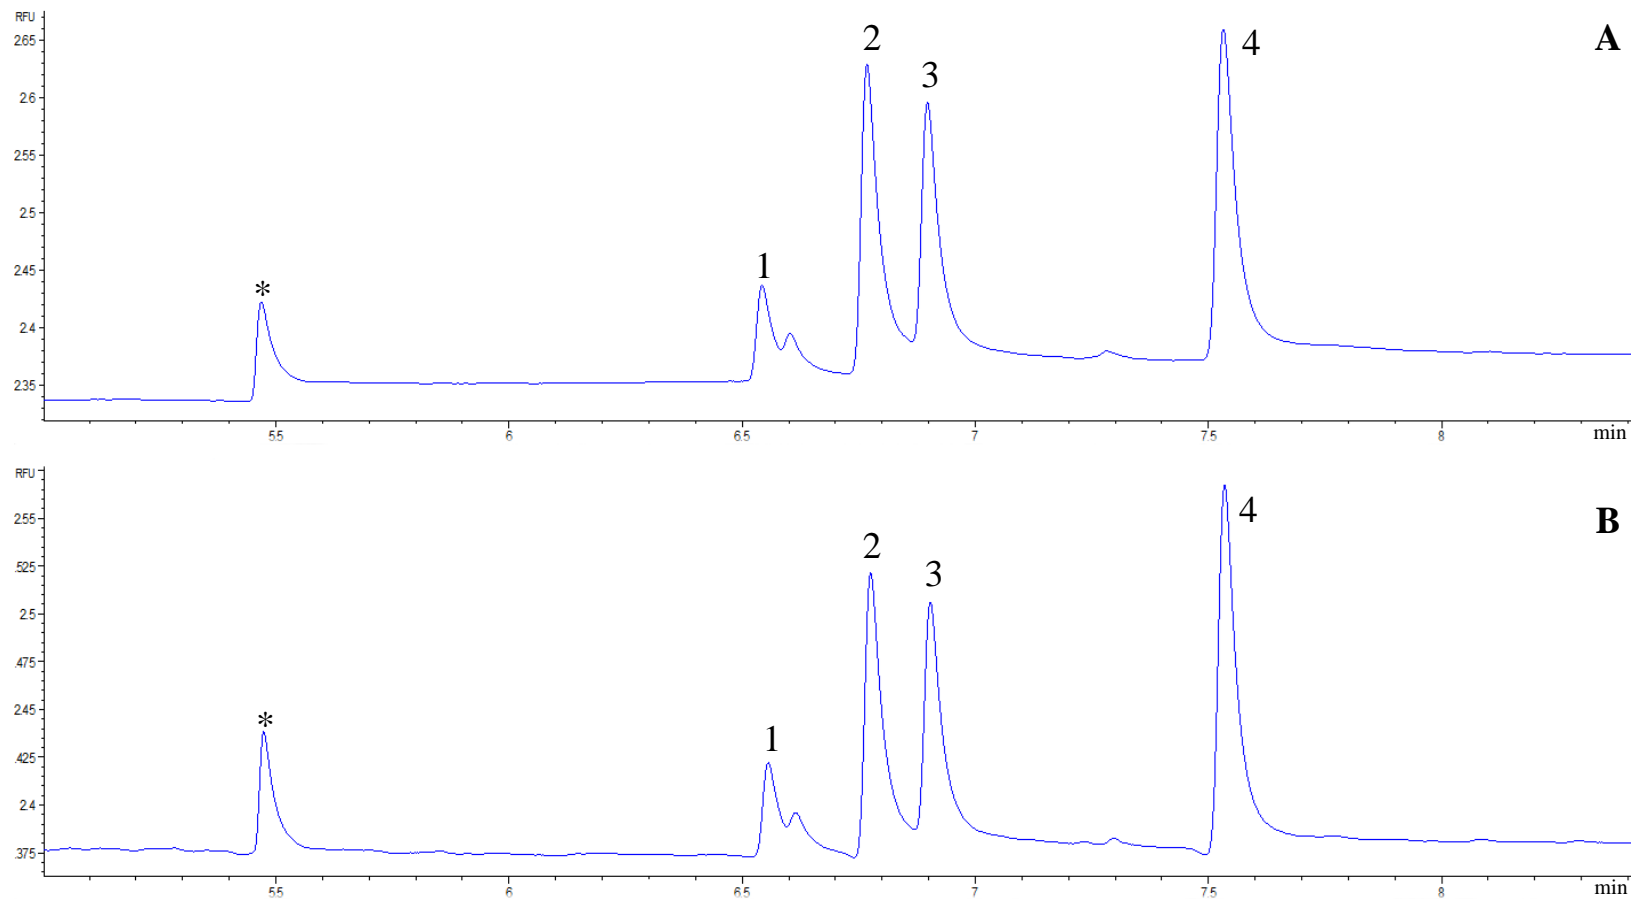

Figure S1: The CZE-LEDIF determinations of a mixture of four carbohydrates using hydrodynamic (A) and electrokinetic injection (B). The analysis conditions were the same as stated at Figure 2B, injection: +5 kV x 5 s (B), samples: 1: fructose, 2: glucose, 3: mannose, 4: maltose, (\*): APTS

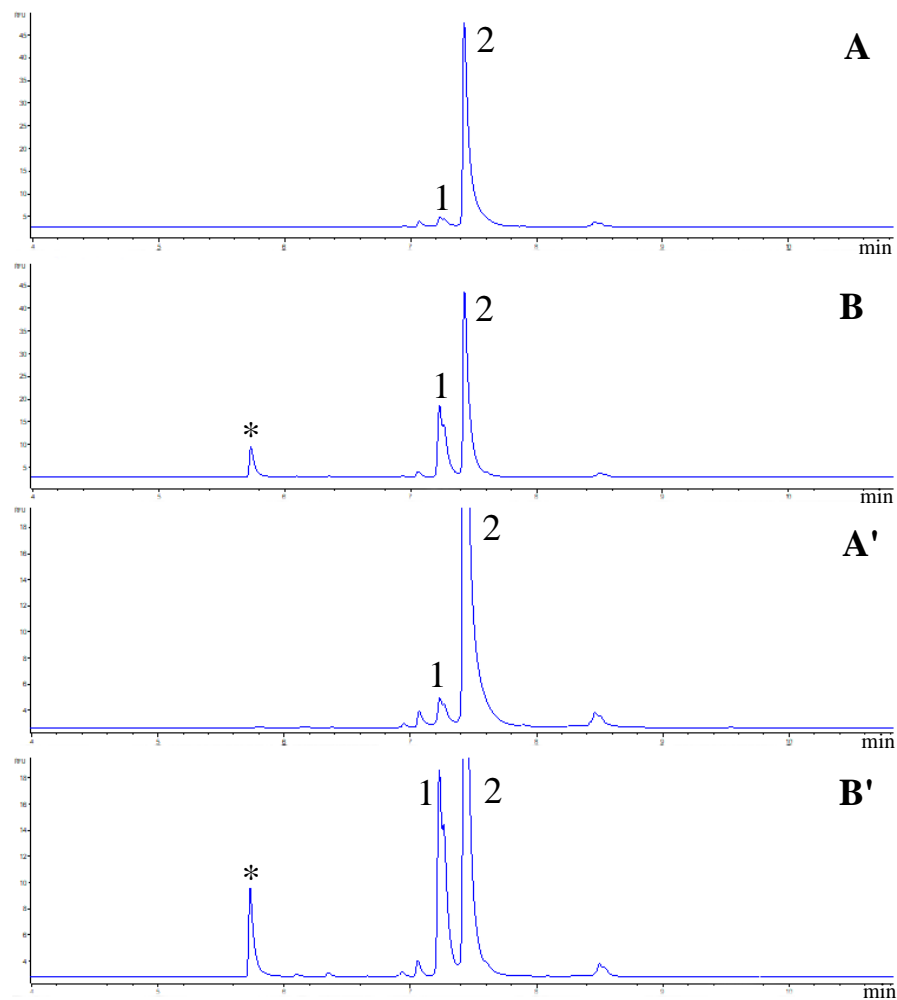

Figure S2: Identification of fructose peak in honey using standard addition. The analysis conditions were the same as stated at Figure 2B. Sample: 1: fructose, 2: glucose, (\*): APTS, (A) Phacelia honey, (B) Phacelia honey spiked with fructose, (A', B') narrow scale of electropherograms of (A, B).

## Chemical structures of analyzed sugars and labeling agent

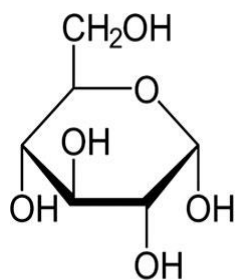

D-glucose

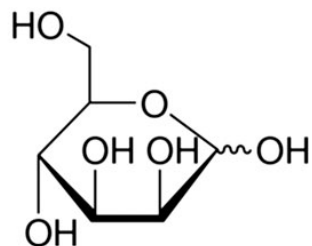

D-mannose

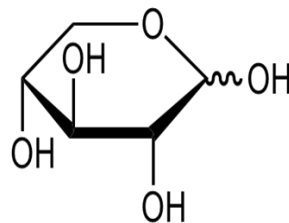

D-xylose

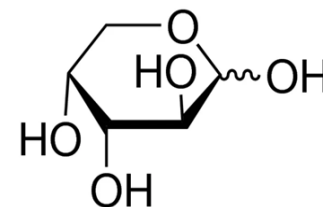

D-arabinose

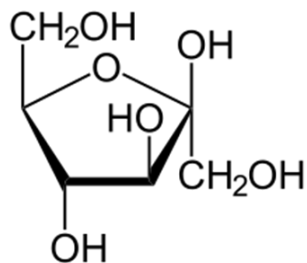

D-fructose

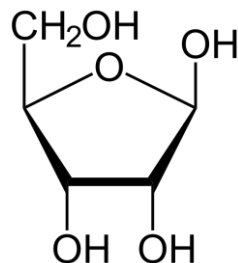

D-ribose

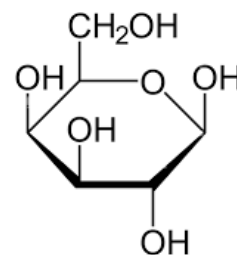

D-galactose

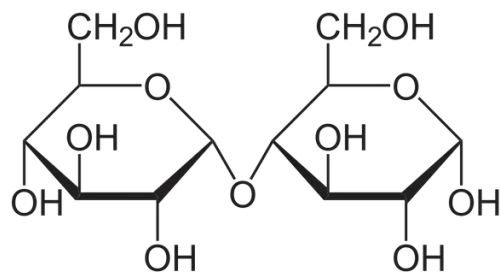

maltose

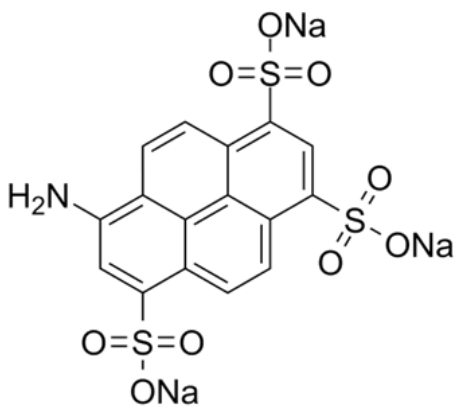

8-aminopyrene-1,3,6-trisulfonic acid sodium salt (APTS)

## Chemical structures of analysed sugars

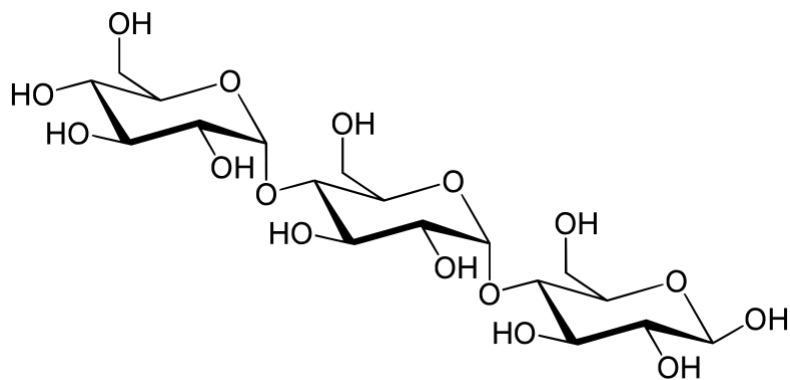

Maltotriose

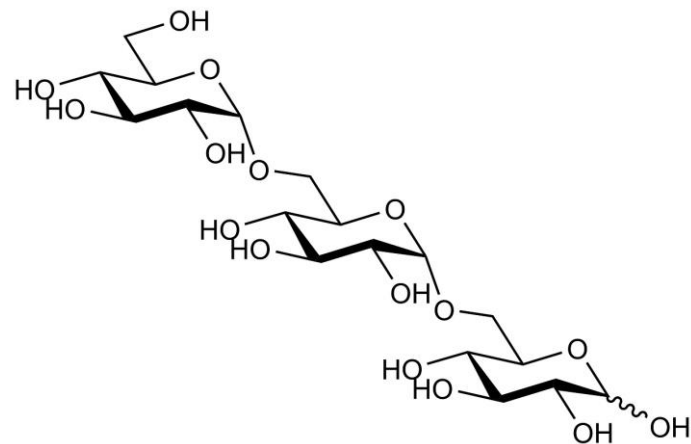

Isomaltotriose

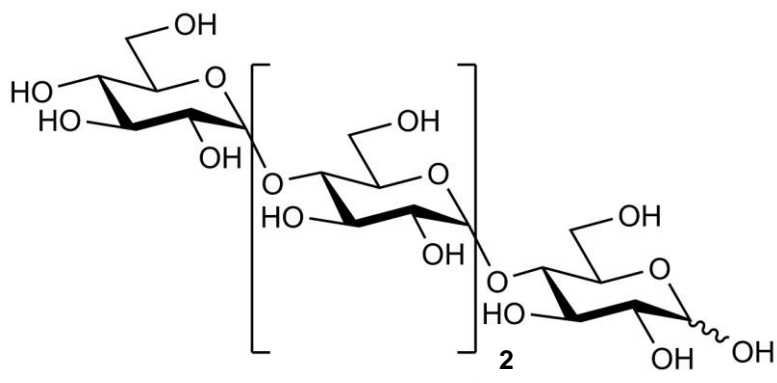

maltotetraose

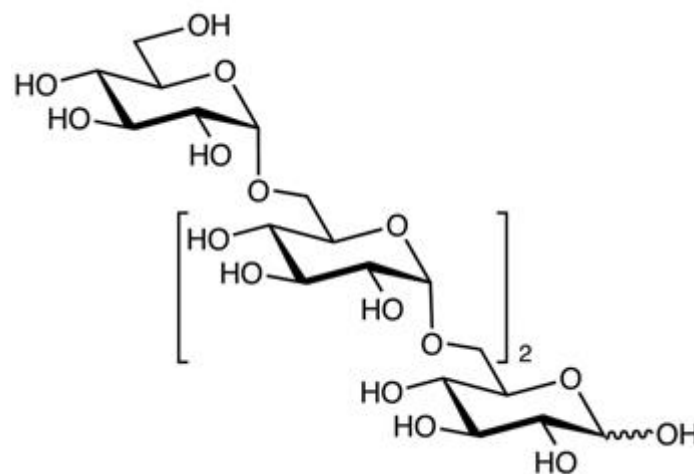

isomaltotetraose
